# Supplementary material for: Encapsulation of Curcumin in Diblock Copolymer Micelles for Cancer Therapy
Source: Hindawi journal article supplement (doi:10.1155/2015/824746), 2015-01-01

## Supplemental Data

**Supplemental Table 1.** Acute toxicity effects of alone PNP on hematological and blood chemical indices in mice

| Parameters                    | Control     | PNP<br>31.25 mg/kg | PNP<br>62.5 mg/kg | PNP<br>125 mg/kg |
|-------------------------------|-------------|--------------------|-------------------|------------------|
| Animal Weight (g)             | 24.3 ± 2.2  | 22 ± 3.3           | 23.4 ± 2.6        | 23.4 ± 2.7       |
| RBC (Millin/mm <sup>3</sup> ) | 6.08 ± 0.2  | 6.5 ± 0.9          | 7.6 ± 0.6         | *8.8 ± 0.6       |
| HCT (%)                       | 36.4 ± 1.5  | 36.7 ± 1.8         | 38.6 ± 2.7        | *40.1 ± 2        |
| Hgb (g/dl)                    | 10 ± 1.2    | 11.6 ± 1.9         | 12.8 ± 1.9        | *14.6 ± 1.6      |
| MCV (fL)                      | 51 ± 0.7    | 51.1 ± 0.9         | 49.9 ± 1          | 52.1 ± 1.2       |
| MCH (pg)                      | 16.5 ± 0.2  | 16.5 ± 0.4         | 16.5 ± 0.6        | 16.3 ± 0.5       |
| MCHC (mol/l)                  | 32.3 ± 0.7  | 32.6 ± 0.6         | 32.6 ± 0.8        | 32.4 ± 0.4       |
| Plt (1000/mm <sup>3</sup> )   | 567 ± 50    | 560 ± 71           | 570 ± 46          | 578 ± 66         |
| WBC (1000/mm <sup>3</sup> )   | 6.7 ± 0.8   | 7.5 ± 2.1          | 7.8 ± 1.8         | 7.9 ± 2.4        |
| Neutrophils (%)               | 35.5 ± 2.3  | 36.7 ± 5           | 39 ± 6            | 41 ± 7           |
| Monocytes (%)                 | 2.1 ± 0.4   | 2.2 ± 0.4          | 3.2 ± 1           | 3.1 ± 0.8        |
| Lymphocytes (%)               | 56.5 ± 6.7  | 55 ± 7             | 56 ± 6            | 54 ± 6           |
| Na (mM/l)                     | 150.3 ± 2.9 | 152 ± 3            | 154 ± 2           | *169.1 ± 5       |
| K (mM/l)                      | 5.2 ± 0.5   | 5.3 ± 1.2          | 6.3 ± 1.8         | *7.7 ± 2         |
| Cl (mM/l)                     | 111 ± 4     | 115 ± 4            | 114 ± 5           | *119 ± 4         |
| HCO <sup>3-</sup> (mM/l)      | 22.6 ± 3.2  | 21.2 ± 2           | 19.6 ± 2          | *15.3 ± 2.3      |
| Osm (mOsm/kg)                 | 307 ± 4.7   | 308 ± 5            | 310.2 ± 5         | *325 ± 6         |
| Ca (mM/l)                     | 0.72 ± 0.14 | 0.66 ± 0.2         | 0.75 ± 0.3        | 0.88 ± 0.3       |
| Mg (mM/l)                     | 0.29 ± 0.04 | 0.31 ± 0.02        | 0.34 ± 0.05       | 0.36 ± 0.04      |
| Glu (mg/dl)                   | 194 ± 33    | 190 ± 56           | 210 ± 39          | 214 ± 45         |
| Lac (mM/l)                    | 5.4 ± 1.2   | 5.3 ± 1.4          | 5.5 ± 2.3         | 5.8 ± 1.9        |
| Urea (mg/dl)                  | 21.2 ± 2.6  | 24.3 ± 2.6         | 27 ± 6            | *48 ± 9          |
| Cr (mg/dl)                    | 0.48 ± 0.08 | 0.52 ± 0.2         | 0.56 ± 0.2        | *1.06 ± 0.2      |
| AST (U/l)                     | 455 ± 45    | 438 ± 80           | 529 ± 66          | *1500 ± 165      |
| ALT (U/l)                     | 68 ± 8.8    | 73.6 ± 9.7         | 116 ± 55          | *377 ± 87        |
| ALP (U/l)                     | 763 ± 50    | 788 ± 55           | 843 ± 46          | *1200 ± 76       |
| GGT (U/l)                     | 5.5 ± 0.5   | 5.4 ± 0.3          | 5.7 ± 0.4         | *8.2 ± 0.9       |
| ALB (mg/dl)                   | 3 ± 0.2     | 3.2 ± 0.3          | 2.7 ± 0.5         | 3.5 ± 0.5        |
| T.BIL (mg/dl)                 | 0.5 ± 0.03  | 0.45 ± 0.13        | 0.55 ± 0.1        | 0.59 ± 0.09      |
| D.BIL (mg/dl)                 | 0.35 ± 0.05 | 0.39 ± 0.09        | 0.35 ± 0.1        | 0.3 ± 0.09       |

Values are means ± SEM. \*P<0.05 compared to control. PNP = The polymeric nanoparticle, RBC= Red blood cell, HCT= hematocrit, MCV = Mean Corpuscular Volume, MCH= Mean Corpuscular Hemoglobin, MCHC= Mean Corpuscular Hemoglobin Concentration, WBC= White blood cells, Plt = Platelets, Na = Sodium, K = Potassium, Cl = Chloride, HCO<sup>3-</sup> = Bicarbonate, Osm = osmolarity, Ca = Calcium, Mg =Magnesium, Cr = Creatinine, Lac = Lactate, Glu = Glucose, AST = Aspartate transaminase, ALT = Alanine transaminase, ALP = Alkaline phosphatase, GGT = Gamma-glutamyl transpeptidase, ALB = Albumin, T.BIL = Total bilirubin, D.BIL = Direct Bilirubin.

**Supplemental Table 2.** Chronic toxicity effects of PNP on hematological and blood chemical indices in mice

| Groups                        | Control     | PNP<br>15.63 mg/kg<br>1 W | PNP<br>31.25 mg/kg<br>1 W | PNP<br>62.5 mg/kg<br>1 W |
|-------------------------------|-------------|---------------------------|---------------------------|--------------------------|
| Animal Weight (g)             | 24.3 ± 2.2  | 23 ± 2.2                  | 23.8 ± 2.5                | *18.2 ± 3.1              |
| RBC (Millin/mm <sup>3</sup> ) | 6.08 ± 0.08 | 6.5 ± 0.1                 | 6.7 ± 0.4                 | *8.5 ± 0.5               |
| HCT (%)                       | 36.4 ± 1.7  | 36.8 ± 2.6                | 37.5 ± 2.2                | 42.2 ± 3.3               |
| Hgb (g/dl)                    | 11 ± 1.2    | 11.5 ± 1.4                | 10.8 ± 1.4                | 14.5 ± 2                 |
| MCV (FL)                      | 51 ± 0.7    | 52.1 ± 0.7                | 51.2 ± 1.5                | 52.5 ± 1.3               |
| MCH (pg)                      | 16.5 ± 0.2  | 16.6 ± 0.6                | 16.7 ± 0.8                | 16.6 ± 0.7               |
| MCHC (mol/l)                  | 32.3 ± 0.7  | 32.5 ± 0.5                | 32.3 ± 0.7                | 32.7 ± 0.8               |
| Plt (1000/mm <sup>3</sup> )   | 567 ± 50    | 579 ± 86                  | 555 ± 59                  | 584 ± 87                 |
| WBC (1000/mm <sup>3</sup> )   | 6.7 ± 0.8   | 7.4 ± 1.1                 | 7.2 ± 1.9                 | 7.3 ± 1.8                |
| Neutrophils (%)               | 32.5 ± 2    | 38 ± 9                    | 35.3 ± 7                  | 39 ± 6                   |
| Monocytes (%)                 | 2.1 ± 3     | 3.3 ± 2.1                 | 2.8 ± 1.3                 | 2.9 ± 1.2                |
| Lymphocytes (%)               | 66.5 ± 6.4  | 57 ± 12                   | 63.6 ± 7.2                | 58 ± 11                  |
| Na (mM/l)                     | 150.3 ± 2.9 | 149.7 ± 3.2               | 151.2 ± 3.8               | *164.2 ± 5.5             |
| K (mM/l)                      | 5.2 ± 0.5   | 5.7 ± 1.6                 | 4.9 ± 0.4                 | *7.4 ± 1.6               |
| Cl (mM/l)                     | 111 ± 4     | 113.6 ± 3.1               | 113.7 ± 2.8               | *119.5 ± 2.5             |
| HCO <sup>3-</sup> (mM/l)      | 22.6 ± 3.2  | 16.7 ± 4.9                | 19.9 ± 3.2                | *16.9 ± 2.7              |
| Osm (mOsm/kg)                 | 307 ± 4.7   | 303.4 ± 10                | 310.9 ± 9.3               | 317.8 ± 9                |
| Ca (mM/l)                     | 0.72 ± 0.14 | 0.63 ± 0.24               | 0.71 ± 0.27               | 0.87 ± 0.09              |
| Mg (mM/l)                     | 0.29 ± 0.04 | 0.31 ± 0.05               | 0.33 ± 0.06               | 0.37 ± 0.03              |
| Glu (mg/dl)                   | 194 ± 33    | 214 ± 35                  | 182 ± 45                  | 89 ± 32                  |
| Lac (mM/l)                    | 5.4 ± 1.2   | 4.9 ± 1.2                 | 5.4 ± 1.3                 | 4.7 ± 1.8                |
| Urea (mg/dl)                  | 21.2 ± 2.6  | 21.4 ± 3.3                | 25 ± 2.8                  | *38.5 ± 3                |
| Cr (mg/dl)                    | 0.48 ± 0.08 | 0.47 ± 0.06               | 0.57 ± 0.05               | *1.20 ± 0.1              |
| AST (U/l)                     | 455 ± 45    | 460 ± 69                  | 513 ± 43                  | *789 ± 55                |
| ALT (U/l)                     | 68 ± 8.8    | 74.3 ± 7.9                | 79.3 ± 15                 | *102 ± 10                |
| ALP (U/l)                     | 763 ± 50    | 640 ± 73                  | 789 ± 75                  | *207 ± 23                |
| GGT (U/l)                     | 5.5 ± 0.5   | 5.7 ± 0.4                 | 5.8 ± 0.6                 | *8.5 ± 0.9               |
| ALB (mg/dl)                   | 3 ± 0.2     | 3.4 ± 0.4                 | 3.5 ± 0.5                 | *1.5 ± 0.4               |
| T.BIL (mg/dl)                 | 0.5 ± 0.03  | 0.5 ± 0.07                | 0.55 ± 0.1                | 0.56 ± 0.09              |
| D.BIL (mg/dl)                 | 0.35 ± 0.05 | 0.36 ± 0.06               | 0.33 ± 0.04               | 0.37 ± 0.07              |

Values are means ± SEM. \*P<0.05 compared to control. PNP = The polymeric nanoparticle, RBC= Red blood cell, HCT= hematocrit, MCV = Mean Corpuscular Volume, MCH= Mean Corpuscular Hemoglobin, MCHC= Mean Corpuscular Hemoglobin Concentration, WBC= White blood cells, Plt = Platelets, Na = Sodium, K = Potassium, Cl = Chloride, HCO<sup>3-</sup> = Bicarbonate, Osm = osmolarity, Ca = Calcium, Mg =Magnesium, Cr = Creatinine, Lac = Lactate, Glu = Glucose, AST = Aspartate transaminase, ALT = Alanine transaminase, ALP = Alkaline phosphatase, GGT = Gamma-glutamyl transpeptidase, ALB = Albumin, T.BIL = Total bilirubin, D.BIL = Direct Bilirubin.

**Supplemental Table 3.** Chronic toxicity effects of PNPC (31.25 mg/kg) on hematological and blood chemical indices in mice

| Groups<br>Parameters          | Control     | PNPC<br>1 W | PNPC<br>2 W | PNPC<br>4 W | PNPC<br>12 W |
|-------------------------------|-------------|-------------|-------------|-------------|--------------|
| Animal Weight (g)             | 24.3 ± 2.2  | 26.3 ± 3.4  | 28.1 ± 3    | 30.2 ± 3.1  | 32.3 ± 3.2   |
| RBC (Millin/mm <sup>3</sup> ) | 6.08 ± 0.08 | 6.9 ± 0.3   | 6.3 ± 0.5   | 6.8 ± 0.8   | 7.2 ± 0.9    |
| HCT (%)                       | 38.4 ± 1.7  | 37.4 ± 1.2  | 39.4 ± 3.1  | 39.1 ± 2.2  | 39.4 ± 2.7   |
| Hgb (g/dl)                    | 10 ± 1.2    | 9.8 ± 0.9   | 11.7 ± 1.6  | 12.1 ± 2.5  | 11.5 ± 2.6   |
| MCV (FL)                      | 51 ± 0.7    | 50.4 ± 2    | 49.5 ± 0.7  | 49 ± 1.1    | 50 ± 0.9     |
| MCH (pg)                      | 16.5 ± 0.2  | 15.7 ± 0.9  | 16.2 ± 0.2  | 16.8 ± 0.5  | 16.1 ± 0.3   |
| MCHC (mol/l)                  | 32.3 ± 0.7  | 32 ± 0.7    | 32.6 ± 0.2  | 32.3 ± 0.7  | 32.3 ± 0.7   |
| Plt (1000/mm <sup>3</sup> )   | 567 ± 50    | 539 ± 53    | 525 ± 47    | 580 ± 70    | 570 ± 58     |
| WBC (1000/mm <sup>3</sup> )   | 6.7 ± 0.8   | 6.5 ± 1.8   | 8.4 ± 2.1   | 7.1 ± 0.9   | 7.3 ± 0.9    |
| Neutrophils (%)               | 32.5 ± 2    | 38.5 ± 11   | 39 ± 4.1    | 37.5 ± 4    | 35.5 ± 0.9   |
| Monocytes (%)                 | 2.1 ± 3     | 1.8 ± 1     | 3.5 ± 1.5   | 3.1 ± 1.2   | 3.7 ± 1.2    |
| Lymphocytes (%)               | 66.5 ± 6.4  | 60.8 ± 5.8  | 58.2 ± 7.1  | 60.5 ± 5.4  | 61.5 ± 5.7   |
| Na (mM/l)                     | 150.3 ± 2.9 | 151.2 ± 3.8 | 153.5 ± 2.2 | 153.3 ± 2.8 | 154.1 ± 3.3  |
| K (mM/l)                      | 5.2 ± 0.5   | 4.9 ± 0.4   | 6.1 ± 2.0   | 6.2 ± 0.8   | 6.5 ± 0.7    |
| Cl (mM/l)                     | 111 ± 4     | 112.7 ± 1.8 | 110.5 ± 3.2 | 115 ± 6     | 115 ± 5      |
| HCO <sup>3-</sup> (mM/l)      | 22.6 ± 3.2  | 19.9 ± 3.2  | 22.8 ± 2.5  | 25.5 ± 4.2  | 26.6 ± 5.4   |
| Osm(mOsm/kg)                  | 307 ± 4.7   | 306.9 ± 8.2 | 309 ± 6     | 312 ± 5.7   | 313 ± 5.2    |
| Ca (mM/l)                     | 0.72 ± 0.14 | 0.74 ± 0.07 | 0.81 ± 0.2  | 0.82 ± 0.2  | 0.85 ± 0.15  |
| Mg (mM/l)                     | 0.29 ± 0.04 | 0.32 ± 0.04 | 0.29 ± 0.02 | 0.33 ± 0.07 | 0.35 ± 0.6   |
| Glu (mg/dl)                   | 194 ± 33    | 172 ± 40    | 208 ± 27    | 214 ± 35    | 204 ± 30     |
| Lac (mM/l)                    | 5.4 ± 1.2   | 5.1 ± 1.1   | 6.2 ± 2.1   | 5.2 ± 1.1   | 5.0 ± 2.2    |
| Urea (mg/dl)                  | 21.2 ± 2.6  | 20 ± 2.6    | 25.7 ± 3.5  | 25.2 ± 3.6  | 24.4 ± 3.4   |
| Cr (mg/dl)                    | 0.48 ± 0.08 | 0.53 ± 0.03 | 0.58 ± 0.15 | 0.62 ± 0.09 | 0.61 ± 0.07  |
| AST (U/l)                     | 455 ± 45    | 503 ± 33    | 568 ± 61    | 495 ± 55    | 555 ± 60     |
| ALT (U/l)                     | 68 ± 8.8    | 76.3 ± 12   | 77 ± 18     | 84 ± 17     | 78 ± 23      |
| ALP (U/l)                     | 763 ± 50    | 666 ± 85    | 872 ± 98    | 863 ± 90    | 843 ± 75     |
| GGT (U/l)                     | 5.5 ± 0.5   | -           | -           | 5.2 ± 0.6   | 5.6 ± 0.5    |
| ALB (mg/dl)                   | 3 ± 0.2     | -           | -           | 3.1 ± 0.3   | 3.2 ± 0.4    |
| T.BIL (mg/dl)                 | 0.5 ± 0.03  | -           | -           | 0.48 ± 0.04 | 0.52 ± 0.03  |
| D.BIL (mg/dl)                 | 0.35 ± 0.05 | -           | -           | 0.36 ± 0.04 | 0.37 ± 0.06  |

Values are means ± SEM. \*P<0.05 compared to control. PNPC = The polymeric nanoparticle curcumin, RBC= Red blood cell, HCT= hematocrit, MCV = Mean Corpuscular Volume, MCH= Mean Corpuscular Hemoglobin, MCHC= Mean Corpuscular Hemoglobin Concentration, WBC= White blood cells, Plt = Platelets, Na = Sodium, K = Potassium, Cl = Chloride, HCO<sup>3-</sup> = Bicarbonate, Osm = osmolarity, Ca = Calcium, Mg =Magnesium, Cr = Creatinine, Lac = Lactate, Glu = Glucose, AST = Aspartate transaminase, ALT = Alanine transaminase, ALP = Alkaline phosphatase, GGT = Gamma-glutamyl transpeptidase, ALB = Albumin, T.BIL = Total bilirubin, D.BIL = Direct Bilirubin.

**Supplemental Table 4.** Acute toxicity effects of high dose of PNPC and PNP on hematological and blood chemical indices in mice

| Groups<br>Parameters          | PNP<br>62.5 mg/kg | PNP<br>125 mg/kg | PNPC<br>62.5 mg/kg | PNPC<br>125 mg/kg |
|-------------------------------|-------------------|------------------|--------------------|-------------------|
| Animal Weight (g)             | 23.4 ± 2.6        | 23.4 ± 2.7       | 24.7 ± 2.5         | 23.2 ± 2.2        |
| RBC (Millin/mm <sup>3</sup> ) | 7.6 ± 0.6         | 8.8 ± 0.6        | 7.2 ± 0.5          | 8.2 ± 0.4         |
| HCT (%)                       | 38.6 ± 2.7        | 40.1 ± 2         | 38.5 ± 2.5         | 42.5 ± 2          |
| Hgb (g/dl)                    | 12.8 ± 1.9        | 14.6 ± 1.6       | 11.7 ± 1.3         | 13.4 ± 1.6        |
| MCV (FL)                      | 49.9 ± 1          | 52.1 ± 1.2       | 49.3 ± 1.5         | 49.1 ± 1.2        |
| MCH (pg)                      | 16.5 ± 0.6        | 16.3 ± 0.5       | 15.5 ± 0.4         | 15.3 ± 0.3        |
| MCHC (mol/l)                  | 32.6 ± 0.8        | 32.4 ± 0.4       | 32.2 ± 0.4         | 32.5 ± 0.3        |
| Plt (1000/mm <sup>3</sup> )   | 570 ± 46          | 578 ± 66         | 570 ± 45           | 540 ± 38          |
| WBC (1000/mm <sup>3</sup> )   | 7.8 ± 1.8         | 7.9 ± 2.4        | 7.9 ± 1.5          | 8.1 ± 2.2         |
| Neutrophils (%)               | 39 ± 6            | 41 ± 7           | 38 ± 5             | 38.2 ± 6          |
| Monocytes (%)                 | 3.2 ± 1           | 3.1 ± 0.8        | 3.1 ± 1            | 2.1 ± 0.8         |
| Lymphocytes (%)               | 56 ± 6            | 54 ± 6           | 57.2 ± 5           | 57 ± 4            |
| Na (mM/l)                     | 154 ± 2           | 169.1 ± 5        | 154.2 ± 2.1        | 157.1 ± 1.5       |
| K (mM/l)                      | 6.3 ± 1.8         | 7.7 ± 2          | 6.1 ± 1.7          | 8.2 ± 2.2         |
| Cl (mM/l)                     | 114 ± 5           | 119 ± 4          | 114 ± 2            | 117 ± 3           |
| HCO <sup>3-</sup> (mM/l)      | 19.6 ± 2          | 15.3 ± 2.3       | 17.5 ± 2.2         | 16.3 ± 2.7        |
| Osm (mOsm/kg)                 | 310.2 ± 5         | 325 ± 6          | 312.2 ± 7          | 320 ± 8           |
| Ca (mM/l)                     | 0.75 ± 0.3        | 0.88 ± 0.3       | 0.65 ± 0.2         | 0.66 ± 0.3        |
| Mg (mM/l)                     | 0.34 ± 0.05       | 0.36 ± 0.04      | 0.25 ± 0.04        | 0.31 ± 0.03       |
| Glu (mg/dl)                   | 210 ± 39          | 214 ± 45         | 182 ± 30           | 176 ± 25          |
| Lac (mM/l)                    | 5.5 ± 2.3         | 5.8 ± 1.9        | 5.2 ± 2            | 5.7 ± 1.8         |
| Urea (mg/dl)                  | 27 ± 6            | 48 ± 9           | 26 ± 5             | 43 ± 7            |
| Cr (mg/dl)                    | 0.56 ± 0.2        | 1.06 ± 0.2       | 0.55 ± 0.07        | 0.92 ± 0.12       |
| AST (U/l)                     | 529 ± 66          | 1500 ± 165       | 777 ± 80           | 1280 ± 152        |
| ALT (U/l)                     | 116 ± 55          | 377 ± 87         | 86 ± 21            | 258 ± 86          |
| ALP (U/l)                     | 843 ± 46          | 1200 ± 76        | 825 ± 36           | 1187 ± 92         |
| GGT (U/l)                     | 5.7 ± 0.4         | 8.2 ± 0.9        | -                  | 6.2 ± 0.6         |
| ALB (mg/dl)                   | 2.7 ± 0.5         | 3.5 ± 0.5        | -                  | 2.8 ± 0.4         |
| T.BIL (mg/dl)                 | 0.55 ± 0.1        | 0.59 ± 0.09      | -                  | 0.47 ± 0.05       |
| D.BIL (mg/dl)                 | 0.35 ± 0.1        | 0.3 ± 0.09       | -                  | 0.32 ± 0.04       |

Values are means ± SEM. \*P<0.05 compared to PNCP. PNP = The polymeric nanoparticle, PNPC = The polymeric nanoparticle curcumin, RBC= Red blood cell, HCT= hematocrit, MCV = Mean Corpuscular Volume, MCH= Mean Corpuscular Hemoglobin, MCHC= Mean Corpuscular Hemoglobin Concentration, WBC= White blood cells, Plt = Platelets, Na = Sodium, K = Potassium, Cl = Chloride, HCO<sup>3-</sup> = Bicarbonate, Osm = osmolarity, Ca = Calcium, Mg =Magnesium, Cr = Creatinine, Lac = Lactate, Glu = Glucose, AST = Aspartate transaminase, ALT = Alanine transaminase, ALP = Alkaline phosphatase, GGT = Gamma-glutamyl transpeptidase, ALB = Albumin, T.BIL = Total bilirubin, D.BIL = Direct Bilirubin.

**Supplemental Table 5.** Chronic toxicity effects of high dose of PNP and PNP on hematological and blood chemical indices and the organs weight percentage in mice

| Groups                        | PNP<br>31.25 mg/kg | PNP<br>62.5 mg/kg | PNPC<br>31.25 mg/kg | PNPC<br>62.5 mg/kg |
|-------------------------------|--------------------|-------------------|---------------------|--------------------|
| Parameters                    |                    |                   |                     |                    |
| Animal Weight (g)             | 23.8 ± 2.5         | 18.2 ± 3.1        | 23.3 ± 3.4          | 18.3 ± 2.7         |
| RBC (Millin/mm <sup>3</sup> ) | 6.7 ± 0.4          | 8.5 ± 0.5         | 6.9 ± 0.3           | 7.7 ± 0.4          |
| HCT (%)                       | 37.5 ± 2.2         | 42.2 ± 3.3        | 37.4 ± 1.2          | 40.3 ± 3.2         |
| Hgb (g/dl)                    | 10.8 ± 1.4         | 14.5 ± 2          | 9.8 ± 0.9           | 12.3 ± 1           |
| MCV (FL)                      | 51.2 ± 1.5         | 52.5 ± 1.3        | 50.4 ± 2            | 49.5 ± 1.5         |
| MCH (pg)                      | 16.7 ± 0.8         | 16.6 ± 0.7        | 15.7 ± 0.9          | 15.6 ± 0.5         |
| MCHC (mol/l)                  | 32.3 ± 0.7         | 32.7 ± 0.8        | 32 ± 0.7            | 32.2 ± 0.6         |
| Plt (1000/mm <sup>3</sup> )   | 555 ± 59           | 584 ± 87          | 539 ± 53            | 594 ± 41           |
| WBC (1000/mm <sup>3</sup> )   | 7.2 ± 1.9          | 7.3 ± 1.8         | 6.5 ± 1.8           | 7.7 ± 2.1          |
| Neutrophils (%)               | 35.3 ± 7           | 39 ± 6            | 38.5 ± 11           | 42 ± 9             |
| Monocytes (%)                 | 2.8 ± 1.3          | 2.9 ± 1.2         | 1.8 ± 1             | 3.8 ± 2.2          |
| Lymphocytes (%)               | 63.6 ± 7.2         | 58 ± 11           | 60.8 ± 5.8          | 51 ± 13            |
| Na (mM/l)                     | 151.2 ± 3.8        | 164.2 ± 5.5       | 151.2 ± 3.8         | 157.4 ± 1.5        |
| K (mM/l)                      | 4.9 ± 0.4          | 5.4 ± 1.6         | 4.9 ± 0.4           | 4.3 ± 0.8          |
| Cl (mM/l)                     | 113.7 ± 2.8        | 119.5 ± 2.5       | 112.7 ± 1.8         | 115.5 ± 2.3        |
| HCO <sup>3-</sup> (mM/l)      | 19.9 ± 3.2         | 16.9 ± 2.7        | 19.9 ± 3.2          | 18.9 ± 2.7         |
| Osm (mOsm/kg)                 | 310.9 ± 9.3        | 317.8 ± 9         | 306.9 ± 8.2         | 315.8 ± 7          |
| Ca (mM/l)                     | 0.71 ± 0.27        | 0.87 ± 0.09       | 0.74 ± 0.07         | 0.97 ± 0.6         |
| Mg (mM/l)                     | 0.33 ± 0.06        | 0.37 ± 0.03       | 0.32 ± 0.04         | 0.35 ± 0.03        |
| Glu (mg/dl)                   | 182 ± 45           | 89 ± 32           | 172 ± 40            | 212 ± 30           |
| Lac (mM/l)                    | 5.4 ± 1.3          | 4.7 ± 1.8         | 5.1 ± 1.1           | 4.3 ± 1.5          |
| Urea (mg/dl)                  | 25 ± 2.8           | *38.5 ± 3         | 20 ± 2.6            | 24.5 ± 3.8         |
| Cr (mg/dl)                    | 0.57 ± 0.05        | 1.20 ± 0.1        | 0.53 ± 0.03         | 0.98 ± 0.08        |
| AST (U/l)                     | 513 ± 43           | *789 ± 55         | 503 ± 33            | 585 ± 36           |
| ALT (U/l)                     | 79.3 ± 15          | 102 ± 10          | 76.3 ± 12           | 92.3 ± 5           |
| ALP (U/l)                     | 789 ± 75           | 211 ± 33          | 666 ± 85            | 207 ± 23           |
| GGT (U/l)                     | 5.8 ± 0.6          | 8.5 ± 0.9         | 5.9 ± 0.8           | 6.4 ± 1            |
| ALB (mg/dl)                   | 3.5 ± 0.5          | *1.5 ± 0.4        | 3.4 ± 0.6           | 2.3 ± 0.3          |
| T.BIL (mg/dl)                 | 0.55 ± 0.1         | 0.56 ± 0.09       | 0.47 ± 0.13         | 0.56 ± 0.1         |
| D.BIL (mg/dl)                 | 0.33 ± 0.04        | 0.37 ± 0.07       | 0.38 ± 0.08         | 0.34 ± 0.05        |

Values are means ± SEM. \*P<0.05 compared to PNPC. PNP = The polymeric nanoparticle, PNPC = The polymeric nanoparticle curcumin, RBC= Red blood cell, HCT= hematocrit, MCV = Mean Corpuscular Volume, MCH= Mean Corpuscular Hemoglobin, MCHC= Mean Corpuscular Hemoglobin Concentration, WBC= White blood cells, Plt = Platelets, Na = Sodium, K = Potassium, Cl = Chloride, HCO<sup>3-</sup> = Bicarbonate, Osm = osmolarity, Ca = Calcium, Mg =Magnesium, Cr = Creatinine, Lac = Lactate, Glu = Glucose, AST = Aspartate transaminase, ALT = Alanine transaminase, ALP = Alkaline phosphatase, GGT = Gamma-glutamyl transpeptidase, ALB = Albumin, T.BIL = Total bilirubin, D.BIL = Direct Bilirubin.

Supplemental data Fig. 1.

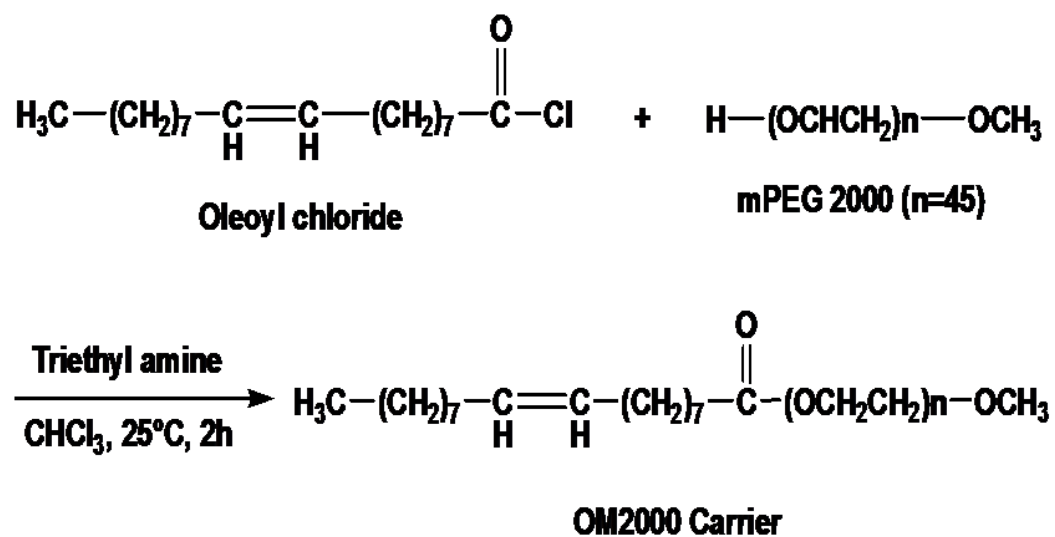

Supplemental data Fig. 2.

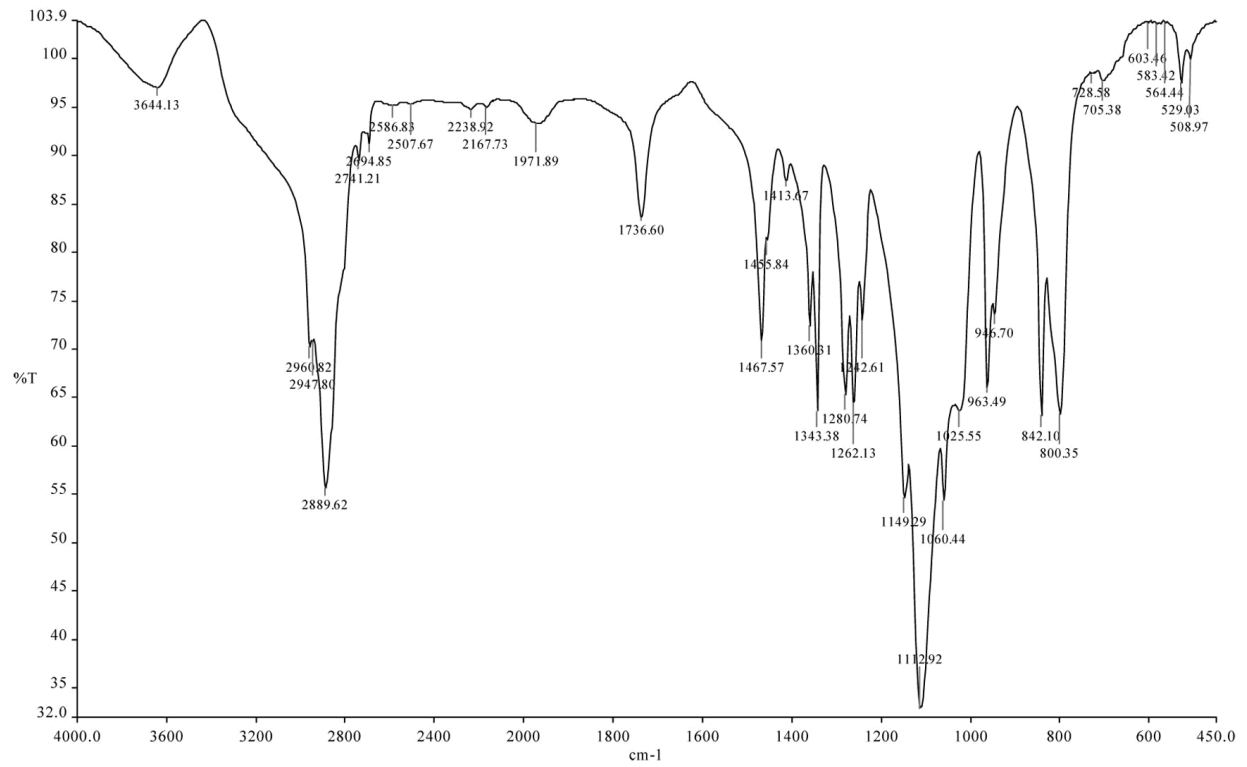





Supplemental data Fig. 3B.

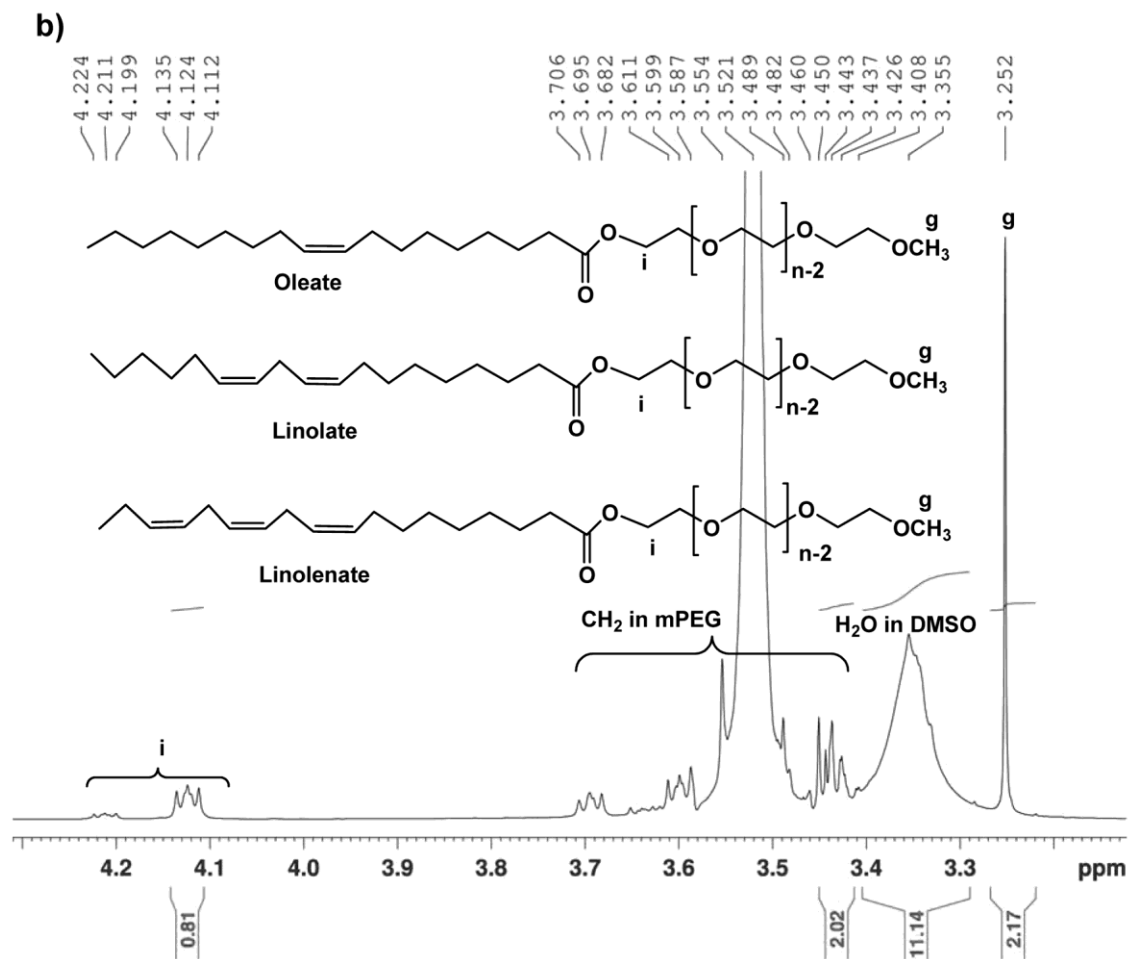

Supplemental data Fig. 3C.

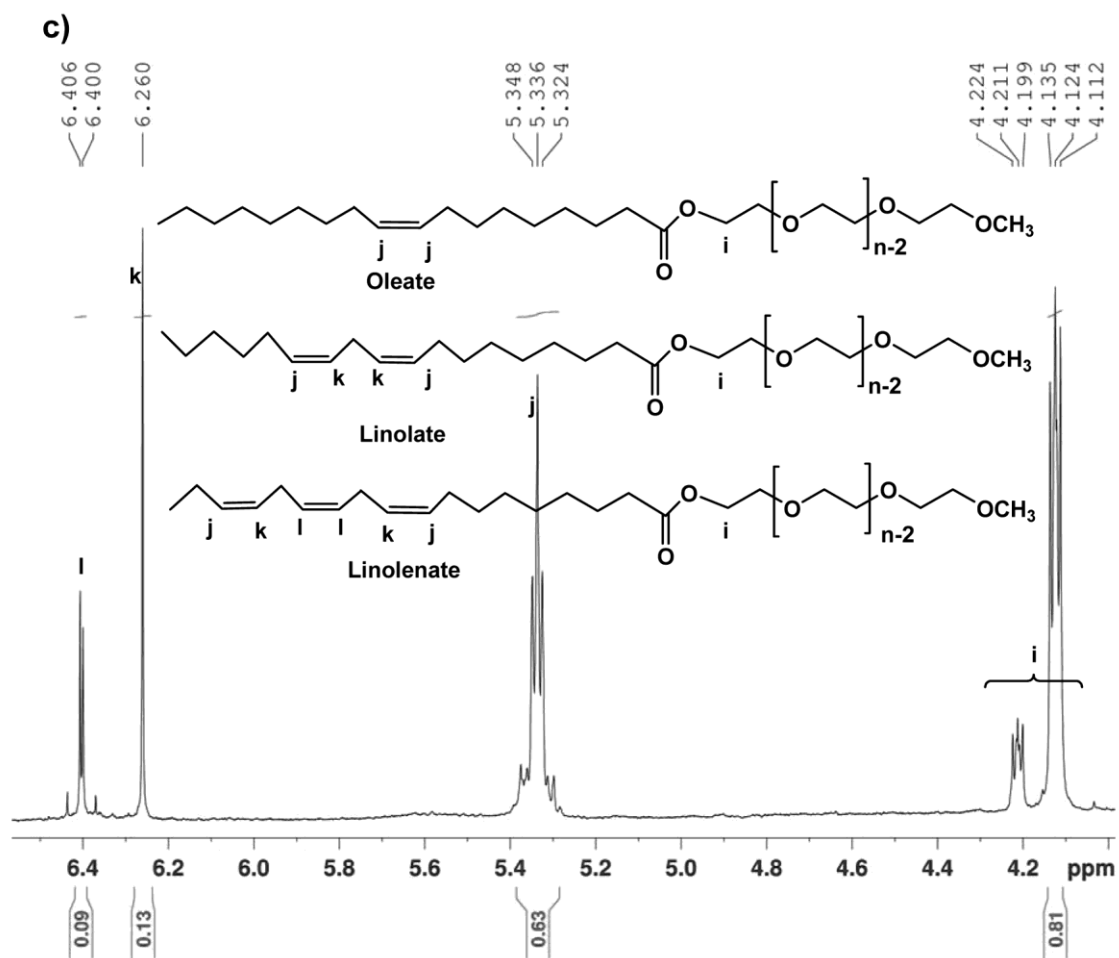

Supplemental data Fig. 4.

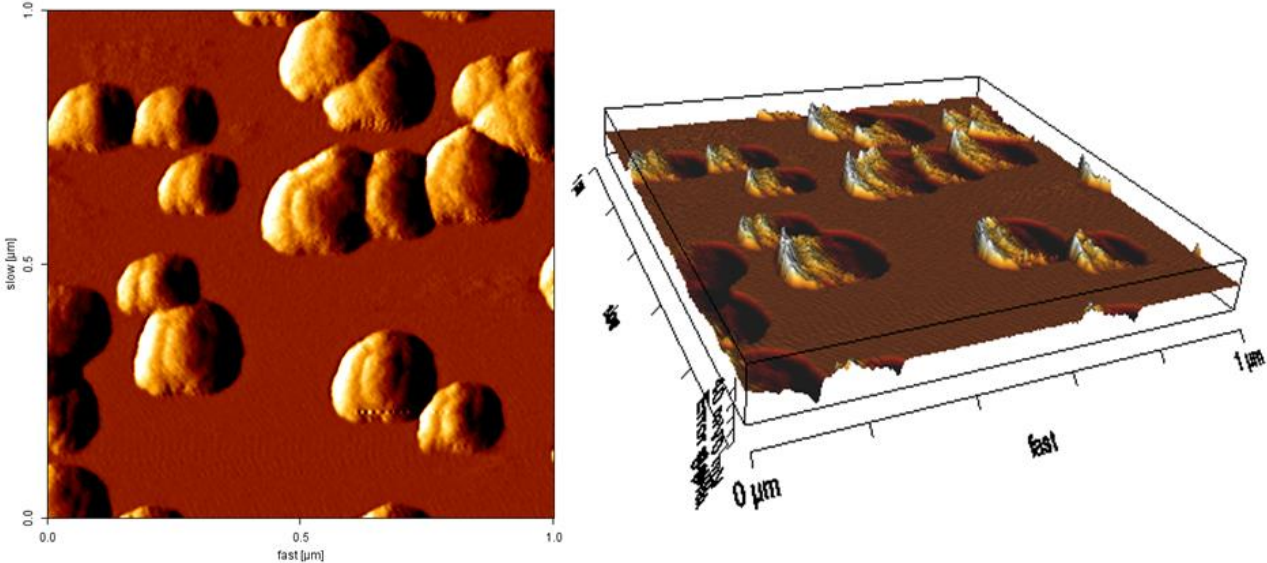

Supplemental data Fig. 5.

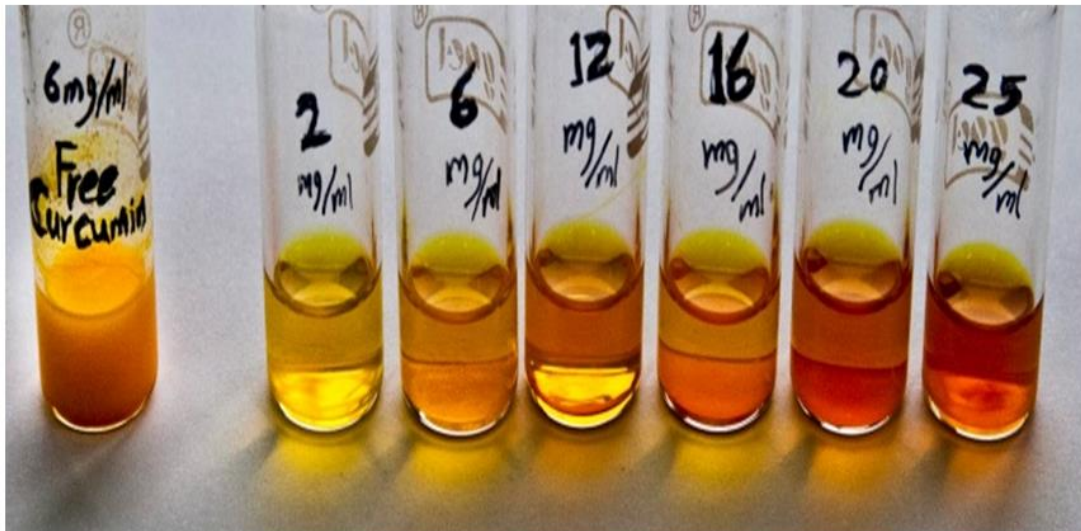

**Supplemental data Fig. 6.**

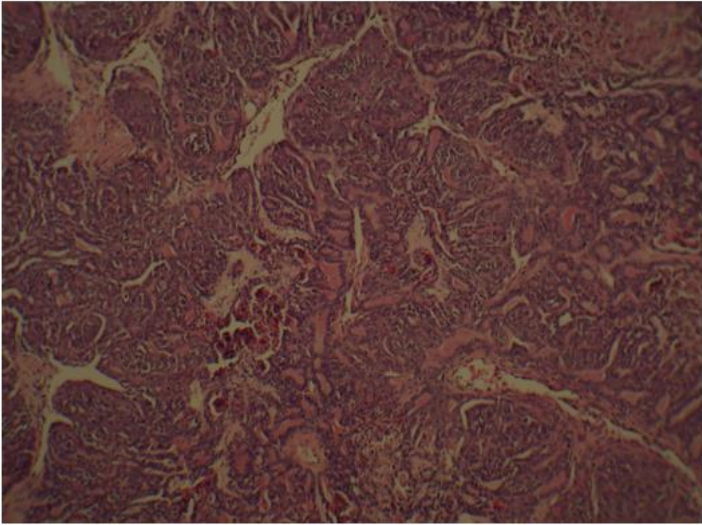

Supplemental data Fig. 7.

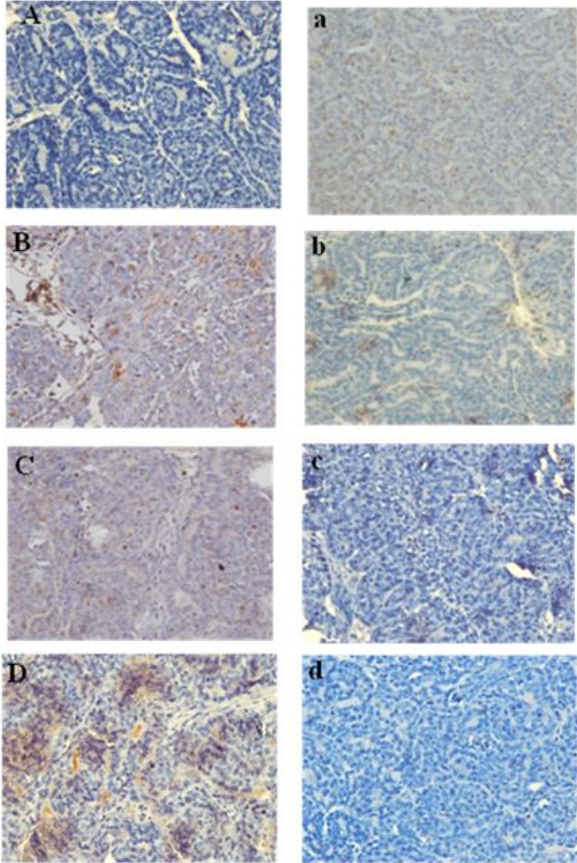

Supplement: f1 [file 824746.f1.pdf]
